# Supplementary material
Source: PubMed Central journal article supplement (PMC7574643)
Supplement: NIHMS1628627-supplement-2.pdf [file NIHMS1628627-supplement-2.pdf]

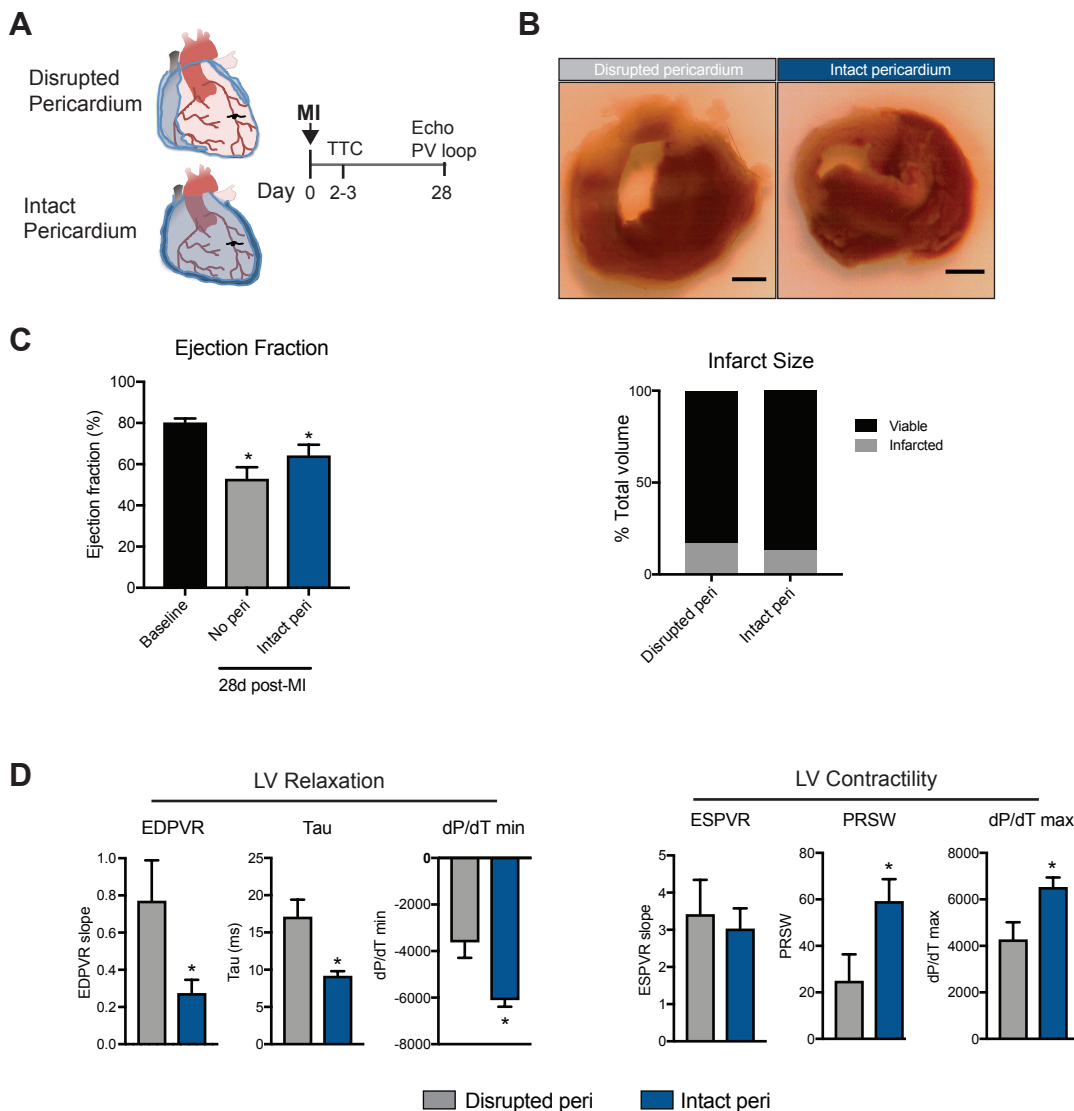

**Fig. S1. An intact pericardial cavity preserves post-MI cardiac function, related to STAR Methods.**

(A) Schematic timeline of coronary ligation procedure with disrupted or intact pericardium. (B) Representative triphenyl tetrazolium chloride (TTC) staining and quantification of infarcted myocardium 48-72hrs post-MI. scale bars = 1mm, n=4. LV functional parameters at 28 days post-infarct for animals with disrupted or intact pericardium measured by echocardiography (C) and pressure-volume assessment (D). Data represented as mean  $\pm$  SEM, n= 7-14/group for echocardiography, n=6-7/group for pressure volume loop measurements. \* $p$ <0.05, one-way ANOVA for ejection fraction, t-test for pressure volume loop measurements.

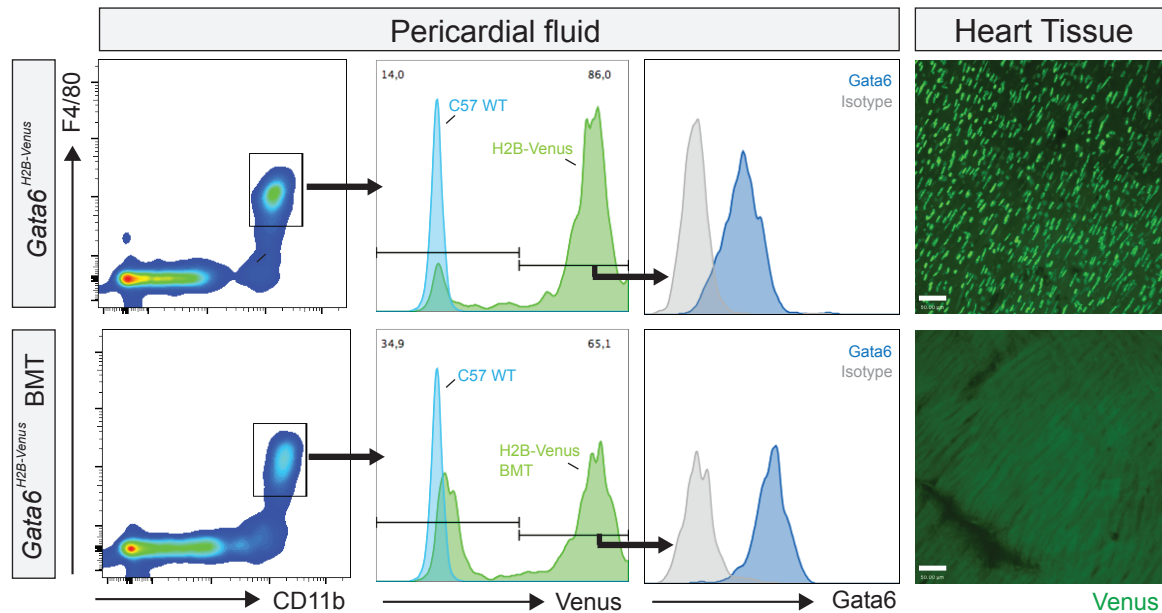

**Fig. S2. *Gata6*<sup>H2B-venus</sup> bone marrow reconstitution of GPCMs, related Figure 4.**

Representative flow cytometry plots of Venus and *Gata6* expression by GPCM and whole mount fluorescence imaging of the heart from *Gata6*<sup>H2B-venus</sup> and *Gata6*<sup>H2B-venus</sup>:C57BL/6J bone marrow chimera (8-10 weeks reconstitution) mice. Representative of 2 independent transfer experiments.

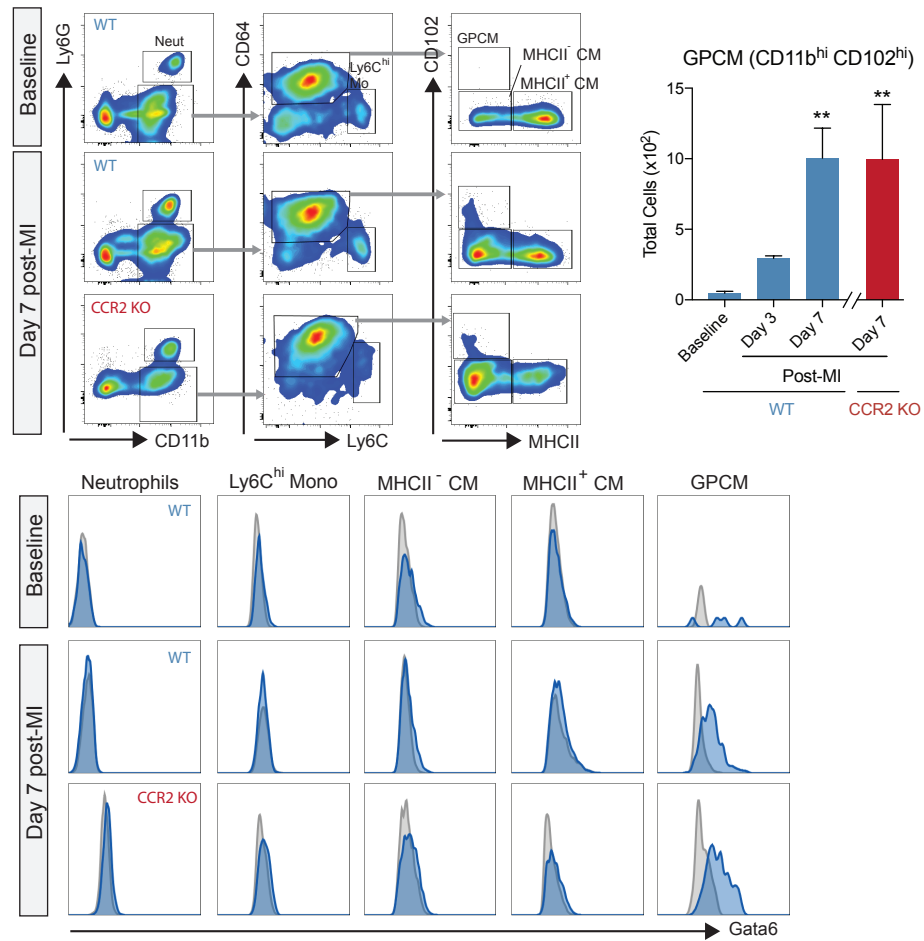

**Fig S3. Recruitment of Gata6<sup>+</sup> macrophages to the heart following MI, related to Figure 4.**

Representative flow plots and quantification of GPCM (CD11b<sup>hi</sup> CD102<sup>+</sup>) number and Gata6 expression in ventricular heart tissue at multiple timepoints pre- and post-MI in the presence or absence of functional CCR2. Data represented as mean ± SEM, n= 3-11 from at least 2 independent experiments. \*\*= p<0.01 vs. baseline, one-way ANOVA.

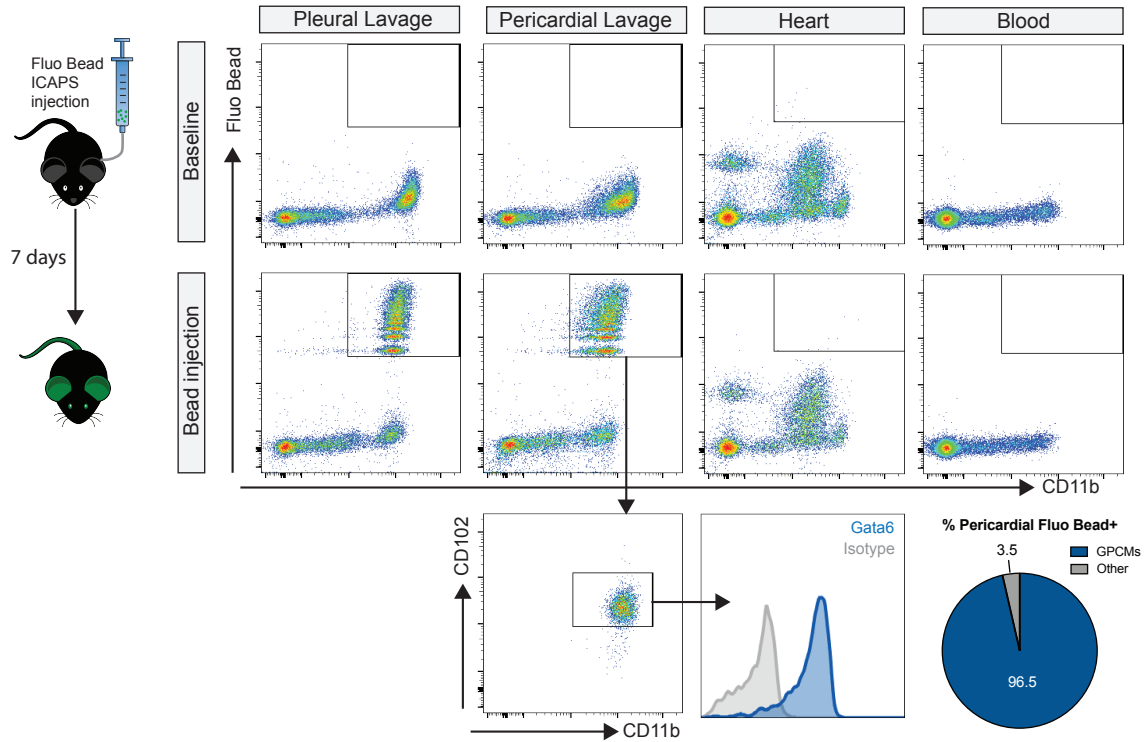

**Fig. S4. Labeling of pericardial cavity macrophages with locally delivered fluorescent beads, related to Figure 5.**

Representative flow cytometry plots fluorescent bead containing myeloid cells from the pleural cavity, pericardial cavity, cardiac tissue, and blood at baseline or 7 days following local injection of fluorescent beads using the ICAPS method. Bottom panels- Characterization of bead+ cells in the pericardial cavity as predominantly GPCMs. Representative of 3 independent experiments.



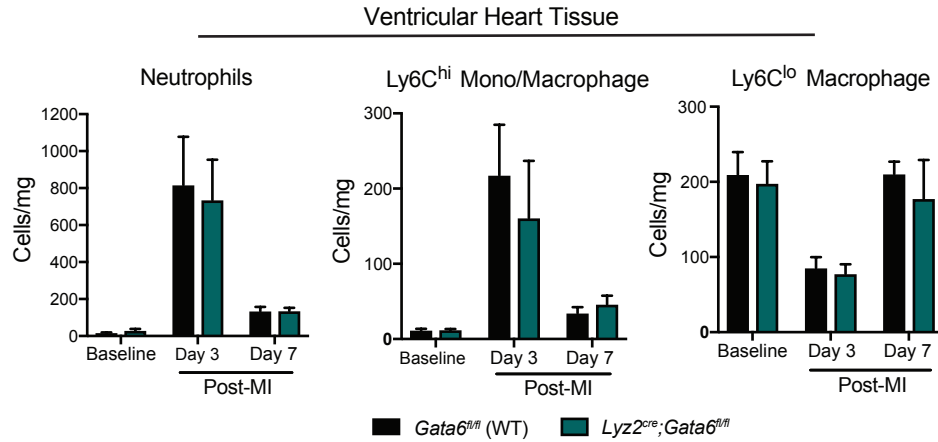

**Fig. S5. Pericardial and cardiac myeloid populations in *Lyz2<sup>cre</sup>;Gata6<sup>fl/fl</sup>* mice, related to Figure 6.**

Quantification of neutrophil, Ly6C<sup>hi</sup> monocytes/macrophage, and Ly6C<sup>lo</sup> macrophages in mouse ventricular tissue pre- and post-MI in *Gata6<sup>fl/fl</sup>* (WT) and *Lyz2<sup>cre</sup>;Gata6<sup>fl/fl</sup>* mice. n=3-11 from at least 2 independent experiments per timepoint.

|                          | Disrupted pericardium |         | Intact pericardium |          | p-value      |
|--------------------------|-----------------------|---------|--------------------|----------|--------------|
|                          | Mean                  | SEM     | Mean               | SEM      |              |
| Body weight-Pre-MI (g)   | 29.50                 | 1.85    | 28.00              | 1.58     | 0.555        |
| HR (bpm)                 | 519.85                | 12.33   | 526.27             | 8.19     | 0.665        |
| SW (mmHg* $\mu$ L)       | 317.19                | 171.82  | 1109.01            | 188.73   | <b>0.011</b> |
| CO ( $\mu$ L/min)        | 4668.33               | 1309.29 | 9078.57            | 1271.34  | <b>0.035</b> |
| SV ( $\mu$ L)            | 8.98                  | 2.51    | 17.36              | 2.54     | <b>0.040</b> |
| EF (%)                   | 37.96                 | 10.44   | 45.00              | 7.56     | 0.588        |
| Ea (mmHg/ $\mu$ L)       | 18.12                 | 5.70    | 5.87               | 1.14     | <b>0.044</b> |
| PowMax (mmHg* $\mu$ L/s) | 35123.33              | 9514.28 | 59950.00           | 13171.58 | 0.167        |
| dP/dt max (mmHg/s)       | 4282.50               | 736.05  | 6539.57            | 401.03   | <b>0.017</b> |
| dP/dt min (mmHg/s)       | -3632.00              | 654.92  | -6111.57           | 278.58   | <b>0.004</b> |
| Tau (ms)                 | 17.14                 | 2.27    | 9.21               | 0.60     | <b>0.004</b> |
| PRSW                     | 25.06                 | 11.28   | 59.30              | 9.42     | <b>0.038</b> |
| EDPVR                    | 0.77                  | 0.22    | 0.28               | 0.07     | <b>0.040</b> |
| ESPVR                    | 3.42                  | 0.92    | 3.04               | 0.54     | 0.716        |

**Table S1. Left ventricle Pressure-Volume Loop assessment 4 weeks post-MI in mice with intact or disrupted pericardium, related to STAR Methods.**

HR-heart rate, SW-stroke work, CO-cardiac output, SV- stroke volume, EF- ejection fraction, Ea-Arterial elastance, PowMax- maximal power, dP-delta pressure, dV-delta volume, PRSW- preload recruitable stroke work, EDPVR- end diastolic pressure volume relationship, ESPVR- end systolic pressure volume relationship.

|                          | Disrupted pericardium |         | Intact pericardium |         | p-value      |
|--------------------------|-----------------------|---------|--------------------|---------|--------------|
|                          | Mean                  | SEM     | Mean               | SEM     |              |
| Body weight-Pre-MI (g)   | 27.50                 | 0.50    | 26.14              | 0.73    | 0.233        |
| HR (bpm)                 | 399.45                | 22.46   | 386.03             | 8.98    | 0.541        |
| SW (mmHg* $\mu$ L)       | 1532.10               | 249.05  | 1028.63            | 164.88  | 0.115        |
| CO ( $\mu$ L/min)        | 8852.00               | 248.26  | 7128.17            | 497.37  | <b>0.030</b> |
| SV ( $\mu$ L)            | 22.43                 | 1.67    | 17.34              | 1.64    | 0.069        |
| EF (%)                   | 39.64                 | 3.86    | 44.83              | 1.96    | 0.222        |
| Ea (mmHg/ $\mu$ L)       | 4.01                  | 0.32    | 4.84               | 0.33    | 0.123        |
| PowMax (mmHg* $\mu$ L/s) | 28967.50              | 9309.50 | 17610.50           | 6361.66 | 0.325        |
| dP/dt max (mmHg/s)       | 6271.25               | 335.11  | 5541.50            | 460.23  | 0.283        |
| dP/dt min (mmHg/s)       | -5094.50              | 587.88  | -4615.50           | 500.07  | 0.556        |
| Tau (ms)                 | 8.81                  | 0.21    | 8.74               | 0.75    | 0.944        |
| PRSW                     | 42.12                 | 2.93    | 50.41              | 3.73    | 0.150        |
| EDPVR                    | 0.30                  | 0.07    | 0.22               | 0.06    | 0.474        |
| ESPVR                    | 3.19                  | 0.62    | 4.30               | 0.80    | 0.346        |

**Table S2. Left ventricle Pressure-Volume Loop assessment 4 weeks post-sham surgery in mice with intact or disrupted pericardium, related to STAR Methods.** HR-heart rate, SW-stroke work, CO-cardiac output, SV- stroke volume, V-volume, P- pressure, es- end systolic, ed- end diastolic, EF- ejection fraction, Ea-Arterial elastance, PowMax- maximal power, dP-delta pressure, dV-delta volume, PRSW- preload recruitable stroke work, EDPVR- end diastolic pressure volume relationship, ESPVR- end systolic pressure volume relationship.

|                        | <i>Gata6</i> <sup>fl/fl</sup> (WT) |          | <i>Lyz2</i> <sup>cre</sup> ; <i>Gata6</i> <sup>fl/fl</sup> |          | p-value      |
|------------------------|------------------------------------|----------|------------------------------------------------------------|----------|--------------|
|                        | Mean                               | SEM      | Mean                                                       | SEM      |              |
| Body weight-Pre-MI (g) | 33.38                              | 1.95     | 34.44                                                      | 1.95     | 0.704        |
| HR (bpm)               | 528.49                             | 10.93    | 503.43                                                     | 13.07    | 0.168        |
| SW (mmHg*μL)           | 1718.25                            | 172.06   | 1155.39                                                    | 239.51   | 0.082        |
| CO (μL/min)            | 12330.00                           | 673.04   | 9068.56                                                    | 1222.91  | <b>0.040</b> |
| SV (μL)                | 23.38                              | 1.36     | 18.04                                                      | 2.46     | 0.087        |
| EF (%)                 | 48.08                              | 3.53     | 33.21                                                      | 3.62     | <b>0.010</b> |
| Ea (mmHg/μL)           | 4.10                               | 0.21     | 5.49                                                       | 0.67     | 0.079        |
| PowMax (mmHg*μL/s)     | 55853.75                           | 18096.77 | 31899.78                                                   | 10000.10 | 0.251        |
| dP/dt max (mmHg/s)     | 7025.63                            | 662.13   | 5889.67                                                    | 491.95   | 0.183        |
| dP/dt min (mmHg/s)     | -6594.88                           | 690.28   | -5381.78                                                   | 461.32   | 0.156        |
| Tau (ms)               | 8.61                               | 0.78     | 7.19                                                       | 0.34     | 0.105        |
| PRSW                   | 71.65                              | 9.26     | 53.58                                                      | 3.66     | 0.077        |
| EDPVR                  | 0.11                               | 0.03     | 0.37                                                       | 0.07     | <b>0.005</b> |
| ESPVR                  | 2.77                               | 0.30     | 3.16                                                       | 0.36     | 0.417        |

**Table S3. Left ventricle PV Loop assessment 4 weeks post-MI in *Gata6*<sup>fl/fl</sup> and *Lyz2*<sup>cre</sup>;*Gata6*<sup>fl/fl</sup> mice, related to Figure 6.**

MI- myocardial infarction, HR-heart rate, SW-stroke work, CO-cardiac output, SV- stroke volume, EF- ejection fraction, Ea-Arterial elastance, PowMax- maximal power, dP-delta pressure, dV-delta volume, PRSW- preload recruitable stroke work, EDPVR- end diastolic pressure volume relationship, ESPVR- end systolic pressure volume relationship.
